# Supplementary material for: Endophytic Fungal Diversity in Cirsium kawakamii from Taiwan
Source: MDPI journal article supplement (doi:10.3390/jof9111076), 2023-11-03
Supplement: s1 [file s1]

## Supplementary information

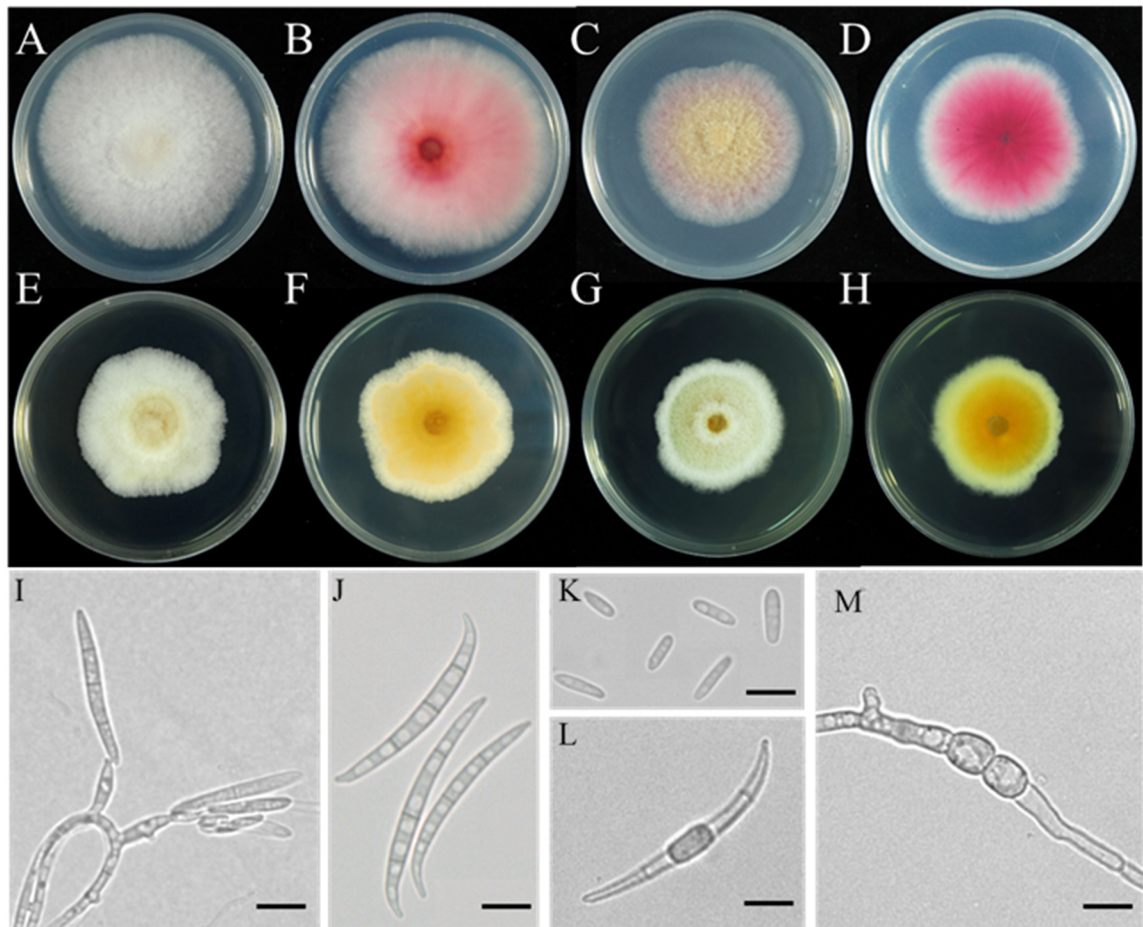

Figure S1. Effects of different culture media on phytopathogen-like endophytic *Fusarium* sp. isolates in this study. For colony morphology: Colony morphology of *Fusarium* sp. isolates cultured on potato sucrose agar (PSA) with 12 h light and dark (A and B), Colony morphology of *Fusarium* sp. isolates cultured on PSA in the dark (C and D), Colony morphology of *Fusarium* sp. isolates cultured on potato dextrose agar (PDA) with 12 h light and dark (E and F), Colony morphology of *Fusarium* sp. isolates cultured on PDA in the dark (G and H); I–M: Conidial morphology of *Fusarium* sp. isolates; I: Short and plump monophialide conidiophore; J: Macroconidia; K: Microconidia; L: Chlamydospore; M: Chlamydospore. Bar, 10 μm.

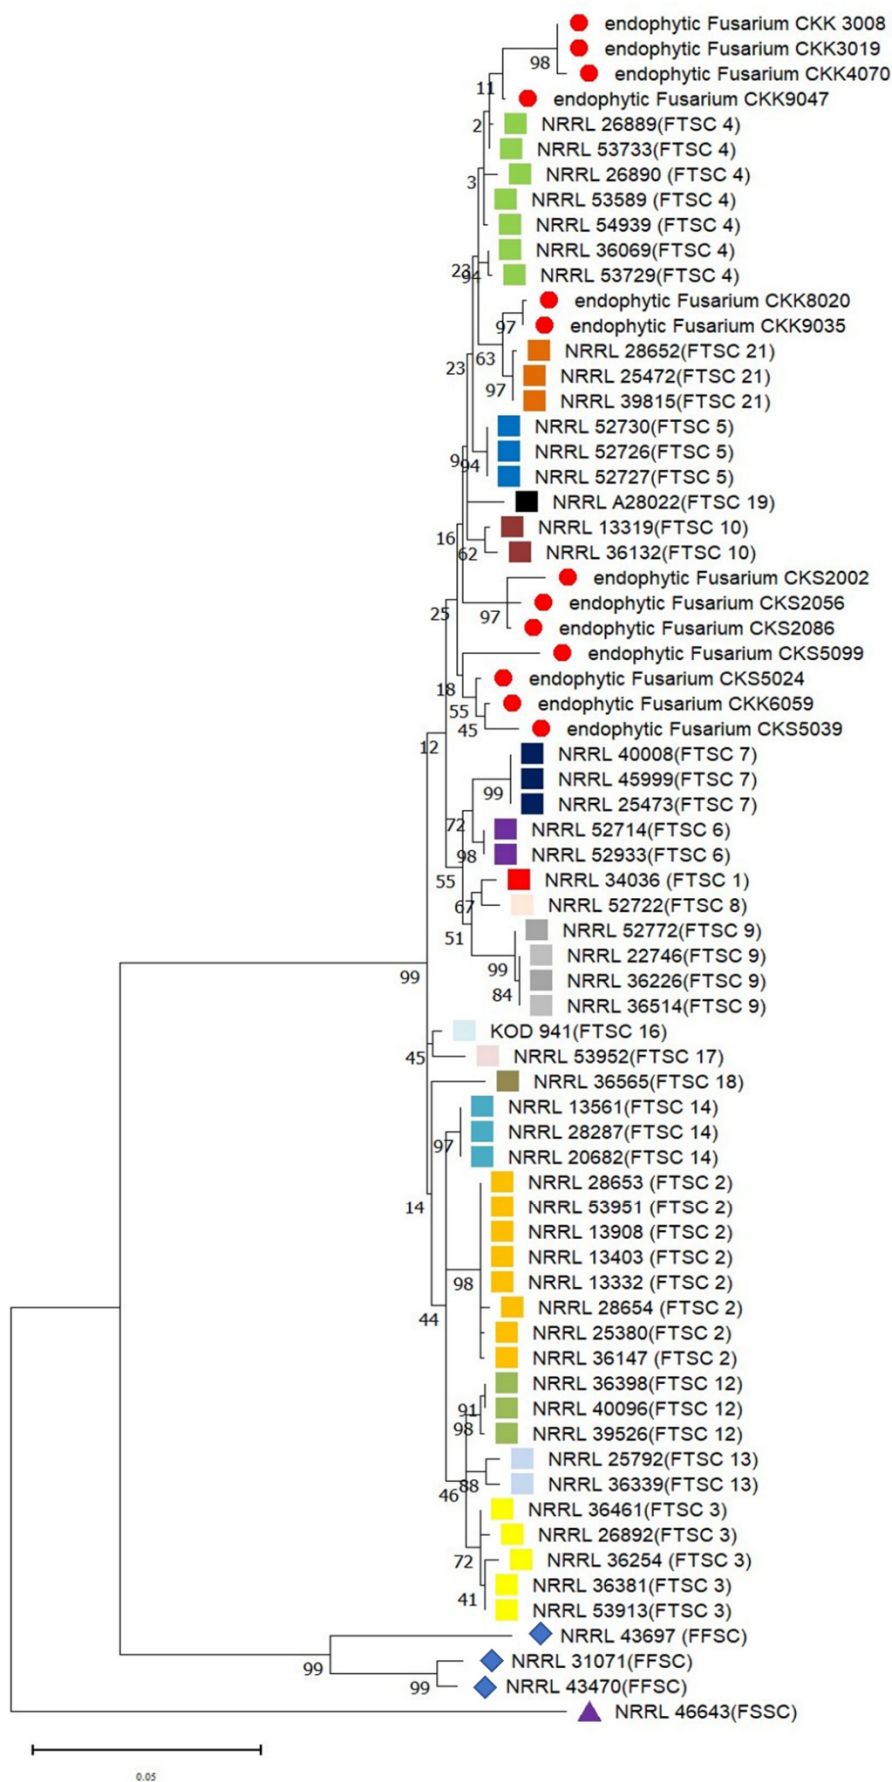

Figure S2. A phylogenetic tree was constructed using the maximum likelihood (ML) method, based on combined sequences of the internal transcribed spacer (ITS) sequence and translation elongation factor 1 alpha (EF-1 $\alpha$ ) gene of endophytic *Fusarium* isolates from *Cirsium kawakamii* in this study (●), related *Fusarium tricinctum* species complex (FTSC) isolates (■), and *Fusarium fujikuroi* species complex (FFSC) isolates (◆) available at NCBI. The tree was rooted with *Fusarium solani* strain NRRL 46643 (▲) as the outgroup, and bootstrap values were determined using 1000 replicates. The scale bar indicates the nucleotide changes.



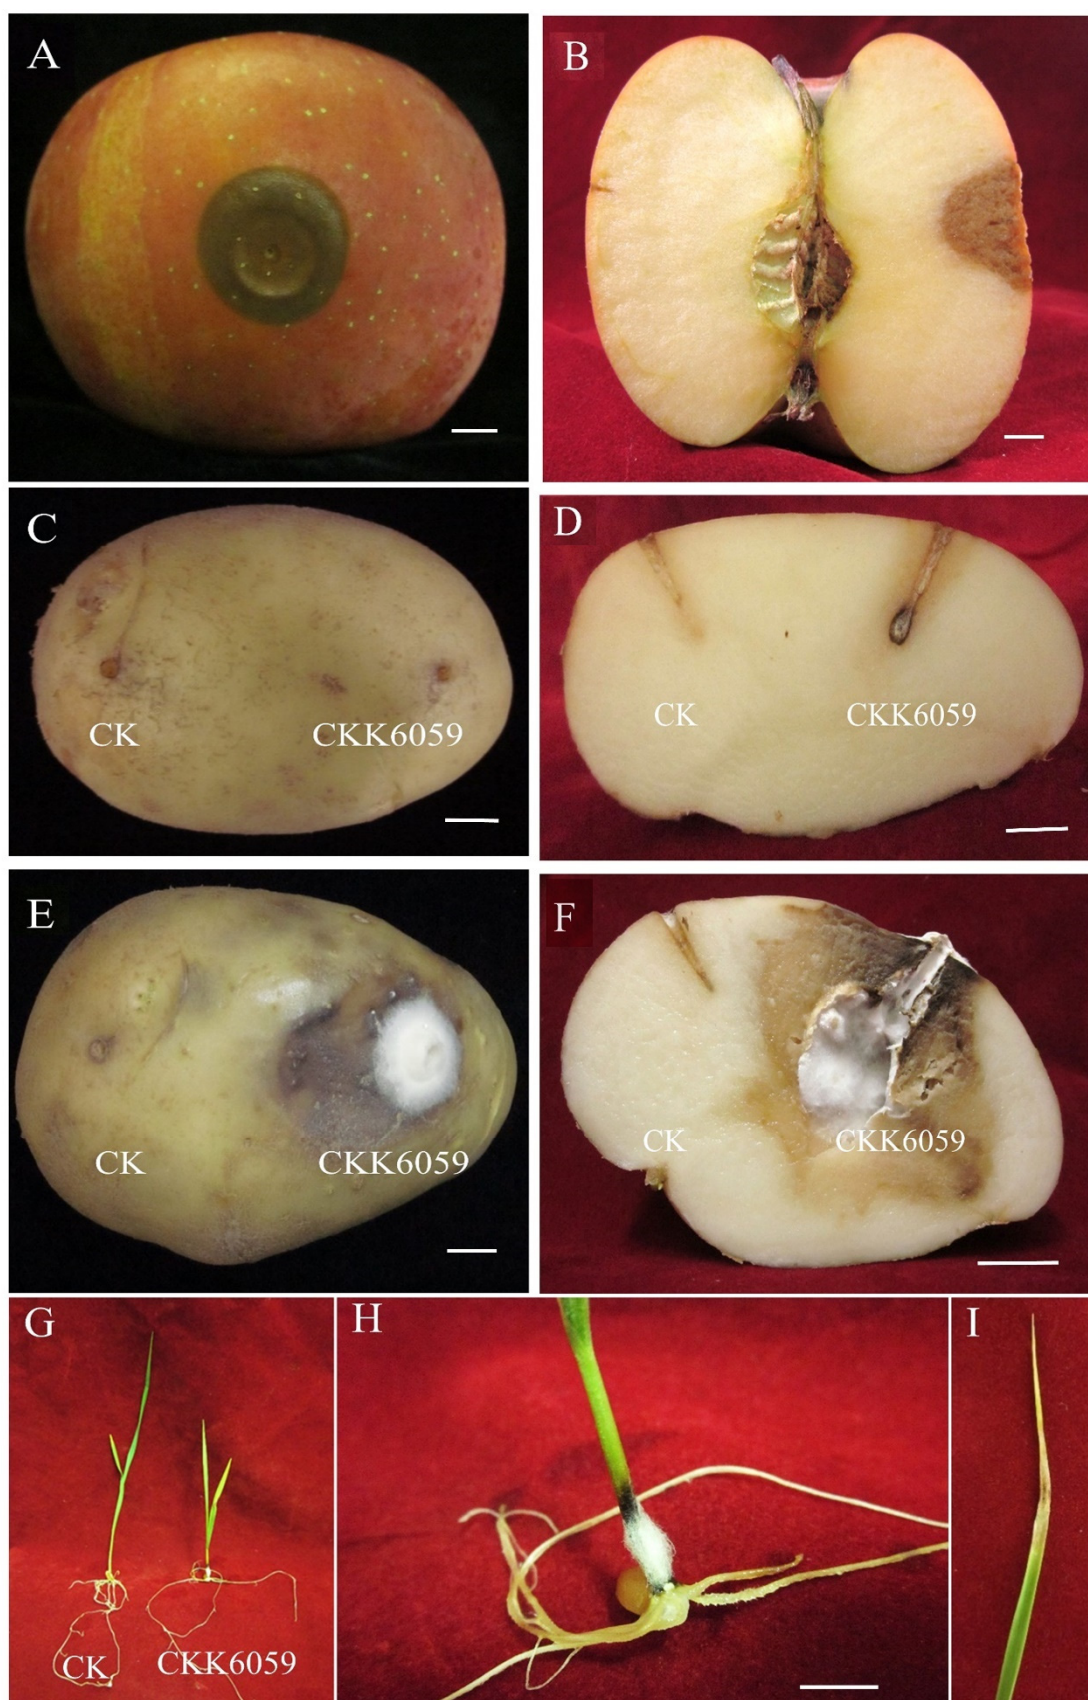

Figure S3. Symptoms of potato, apple, and wheat inoculated with *Fusarium* sp. CKK6059 spore suspension ( $10^6$  conidia/mL). A, B: Symptoms on apple 'Fuji'; C, D: Potato inoculated with CKK6059, after 28 d of incubation at 4 °C; E, F: Potato inoculated with CKK6059, after 28 d of incubation at 20 °C. For wheat: Growth inhibition (G), Necrosis and root-rot of wheat (H), and Leaf blight of wheat (I). Control (CK): inoculation with sterile soil extract broth. (white bar = 1 cm)

Table S1. Endophytic *Fusarium tricinctum* species complex (FTSC)-like isolates collected from *Cirsium kawakamii* in this study

| Collection area <sup>1</sup> | Collection site | Coordinates                    | Elevation (m) | Collection date | Fungal isolates                      |
|------------------------------|-----------------|--------------------------------|---------------|-----------------|--------------------------------------|
| Tatachia                     | 1               | 23°31'15.2"N<br>120°53'41.7"E  | 2,474         | 2013/10/11      | CKK 3008 、<br>CKK 3019 、<br>CKK 4070 |
|                              | 2               | 23°28'29.1"N,<br>120°52'21.1"E | 2,462         | 2013/10/11      | CKK 6059                             |
|                              | 3               | 23°28'34.4"N<br>120°51'55.8"E  | 2,461         | 2013/10/11      | CKK 8020 、<br>CKK 9035 、<br>CKK 9047 |
| Hehuanjian                   | 1               | 24°06'51.4"N<br>121°13'8.6"E   | 2,776         | 2013/09/27      | CKS 2002 、<br>CKS 2056 、<br>CKK 2086 |
|                              | 2               | 24°08'23.1"N<br>121°17'13.7"E  | 3,140         | 2013/09/27      | CKS 5024 、<br>CKS 5039 、<br>CKK 5099 |

<sup>1</sup> The collection area of *Cirsium kawakamii* used for isolating endophytic fungi for this study.

Table S2. GenBank strain numbers for phylogenetic tree analysis of the internal transcribed spacer (ITS) and translation elongation factor subunit alpha (EF-1 $\alpha$ ) sequences in this study

| Complex group <sup>a</sup> | Species              | Strain number | Accession <sup>b</sup> |               |
|----------------------------|----------------------|---------------|------------------------|---------------|
|                            |                      |               | ITS                    | EF1- $\alpha$ |
| --                         | <i>Fusarium</i> sp.  | CKK 3008      | OR540686               | KT273977.1    |
| --                         | <i>Fusarium</i> sp.  | CKK 3019      | OR540687               | KT273978.1    |
| --                         | <i>Fusarium</i> sp.  | CKK 4070      | OR540688               | KT273979.1    |
| --                         | <i>Fusarium</i> sp.  | CKK 6059      | OR540689               | KT273976.1    |
| --                         | <i>Fusarium</i> sp.  | CKK 8020      | OR540690               | KT273983.1    |
| --                         | <i>Fusarium</i> sp.  | CKK 9035      | OR540691               | KT273984.1    |
| --                         | <i>Fusarium</i> sp.  | CKK 9047      | OR540692               | KT273985.1    |
| --                         | <i>Fusarium</i> sp.  | CKS 2002      | OR540693               | KT273986.1    |
| --                         | <i>Fusarium</i> sp.  | CKS 2056      | OR540694               | KT273987.1    |
| --                         | <i>Fusarium</i> sp.  | CKS 2086      | OR540695               | KT273988.1    |
| --                         | <i>Fusarium</i> sp.  | CKS 5024      | OR540696               | KT273989.1    |
| --                         | <i>Fusarium</i> sp.  | CKS 5039      | OR540697               | KT273990.1    |
| --                         | <i>Fusarium</i> sp.  | CKS 5099      | OR540698               | KT273991.1    |
| FTSC 1                     | <i>F. gamsii</i>     | NRRL 34036    | GQ505451.1             | OL772879.1    |
| FTSC 2                     | <i>F. acuminatum</i> | NRRL 13332    | OL832225.1             | OL772797.1    |
| FTSC 2                     | <i>F. acuminatum</i> | NRRL 13403    | OL832175.1             | OL772747.1    |
| FTSC 2                     | <i>F. acuminatum</i> | NRRL 13908    | OL832226.1             | OL772798.1    |
| FTSC 2                     | <i>F. acuminatum</i> | NRRL 25380    | OL832242.1             | OL772814.1    |
| FTSC 2                     | <i>F. acuminatum</i> | NRRL 28653    | OL832231.1             | OL772803.1    |
| FTSC 2                     | <i>F. acuminatum</i> | NRRL 28654    | OL832249.1             | OL772821.1    |
| FTSC 2                     | <i>F. acuminatum</i> | NRRL 36147    | OL832308.1             | OL772880.1    |
| FTSC 2                     | <i>F. acuminatum</i> | NRRL 53951    | OL832232.1             | OL772804.1    |
| FTSC 3                     | <i>F. tricinctum</i> | NRRL 26892    | OL832254.1             | OL772826.1    |
| FTSC 3                     | <i>F. tricinctum</i> | NRRL 36254    | OL832262.1             | OL772834.1    |
| FTSC 3                     | <i>F. tricinctum</i> | NRRL 36381    | OL832258.1             | OL772830.1    |
| FTSC 3                     | <i>F. tricinctum</i> | NRRL 36461    | OL832255.1             | OL772827.1    |
| FTSC 3                     | <i>F. tricinctum</i> | NRRL 53913    | OL832259.1             | OL772831.1    |
| FTSC 4                     | <i>F. avenaceum</i>  | NRRL 26889    | OL832176.1             | OL772748.1    |
| FTSC 4                     | <i>F. avenaceum</i>  | NRRL 36069    | OL832186.1             | OL772758.1    |
| FTSC 4                     | <i>F. avenaceum</i>  | NRRL 36374    | OL832183.1             | OL772755.1    |

| Complex group <sup>a</sup> | Species               | Strain number | Accession <sup>b</sup> |               |
|----------------------------|-----------------------|---------------|------------------------|---------------|
|                            |                       |               | ITS                    | EF1- $\alpha$ |
| FTSC 4                     | <i>F. avenaceum</i>   | NRRL 53589    | OL832187.1             | OL772759.1    |
| FTSC 4                     | <i>F. avenaceum</i>   | NRRL 53729    | OL832188.1             | OL772760.1    |
| FTSC 4                     | <i>F. avenaceum</i>   | NRRL 53733    | OL832184.1             | OL772756.1    |
| FTSC 4                     | <i>F. avenaceum</i>   | NRRL 26890    | OL832177.1             | OL772749.1    |
| FTSC 4                     | <i>F. avenaceum</i>   | NRRL 54939    | OL832320.1             | OL772892.1    |
| FTSC 5                     | <i>Fusarium</i> sp.   | NRRL 52726    | OL832312.1             | OL772884.1    |
| FTSC 5                     | <i>Fusarium</i> sp.   | NRRL 52727    | OL832313.1             | OL772885.1    |
| FTSC 5                     | <i>Fusarium</i> sp.   | NRRL 52730    | OL832314.1             | OL772886.1    |
| FTSC 6                     | <i>F. iranicum</i>    | NRRL 52714    | OL832311.1             | OL772883.1    |
| FTSC 6                     | <i>F. iranicum</i>    | NRRL 52933    | OL832317.1             | OL772889.1    |
| FTSC 7                     | <i>F. flocciferum</i> | NRRL 25473    | OL832306.1             | OL772878.1    |
| FTSC 7                     | <i>F. flocciferum</i> | NRRL 40008    | OL832325.1             | OL772897.1    |
| FTSC 7                     | <i>F. flocciferum</i> | NRRL 45999    | OL832310.1             | OL772882.1    |
| FTSC 8                     | <i>Fusarium</i> sp.   | NRRL 52722    | OL832318.1             | JF740804.1    |
| FTSC 9                     | <i>F. torulosum</i>   | NRRL 22746    | OL832295.1             | OL772867.1    |
| FTSC 9                     | <i>F. torulosum</i>   | NRRL 36514    | OL832296.1             | OL772868.1    |
| FTSC 9                     | <i>F. torulosum</i>   | NRRL 52772    | OL832315.1             | MH582397.1    |
| FTSC 9                     | <i>F. torulosum</i>   | NRRL 36226    | OL832178.1             | OL772750.1    |
| FTSC 10                    | <i>Fusarium</i> sp.   | NRRL 13319    | OL832222.1             | OL772794.1    |
| FTSC 10                    | <i>Fusarium</i> sp.   | NRRL 36132    | OL832217.1             | OL772789.1    |
| FTSC 12                    | <i>Fusarium</i> sp.   | NRRL 36398    | OL832270.1             | OL772842.1    |
| FTSC 12                    | <i>Fusarium</i> sp.   | NRRL 39526    | OL832264.1             | OL772836.1    |
| FTSC 12                    | <i>Fusarium</i> sp.   | NRRL 40096    | OL832267.1             | OL772839.1    |
| FTSC 13                    | <i>F. reticulatum</i> | NRRL 36339    | OL832280.1             | OL772852.1    |
| FTSC 13                    | <i>F. reticulatum</i> | NRRL 25792    | OL832274.1             | OL772846.1    |
| FTSC 14                    | <i>F. negundinis</i>  | NRRL 13561    | OL832250.1             | OL772822.1    |
| FTSC 14                    | <i>F. negundinis</i>  | NRRL 20682    | OL832181.1             | OL772753.1    |
| FTSC 14                    | <i>F. negundinis</i>  | NRRL 28287    | OL832182.1             | OL772754.1    |
| FTSC 16                    | <i>F. sinensis</i>    | KOD 941       | OL832223.1             | OL772795.1    |
| FTSC 17                    | <i>Fusarium</i> sp.   | NRRL 53952    | OL832281.1             | OL772853.1    |
| FTSC 18                    | <i>Fusarium</i> sp.   | NRRL 36565    | OL832304.1             | OL772876.1    |
| FTSC 19                    | <i>Fusarium</i> sp.   | NRRL A28022   | OL832206.1             | OL772778.1    |
| FTSC 21                    | <i>Fusarium</i> sp.   | NRRL 25472    | OL832207.1             | OL772779.1    |



| Complex group <sup>a</sup> | Species                   | Strain number | Accession <sup>b</sup> |               |
|----------------------------|---------------------------|---------------|------------------------|---------------|
|                            |                           |               | ITS                    | EF1- $\alpha$ |
| FTSC 21                    | <i>Fusarium</i> sp.       | NRRL 28652    | OL832209.1             | OL772781.1    |
| FTSC 21                    | <i>Fusarium</i> sp.       | NRRL 39815    | OL832214.1             | OL772786.1    |
| FFSC                       | <i>F. proliferatum</i>    | NRRL 31071    | AF291061.1             | AF291058.1    |
| FFSC                       | <i>F. fujikuroi</i>       | NRRL 43470    | DQ790538.1             | DQ790494.1    |
| FFSC                       | <i>F. verticillioides</i> | NRRL 43697    | EF453174.1             | EF453022.1    |
| FSSC                       | <i>F. solani</i>          | NRRL 46643    | GU250667.1             | GU250544.1    |
| FSSC                       | <i>F. falciforme</i>      | NRRL 43441    | DQ790522.1             | DQ790478.1    |
| FOSC                       | <i>F. oxysporum</i>       | NRRL 43542    | DQ790553.1             | DQ790509.1    |

<sup>a</sup> FTSC: *Fusarium tricinctum* species complex; FFSC: *Fusarium fujikuroi* species complex; FSSC: *Fusarium solani* species complex; FOSC: *Fusarium oxysporum* species complex.

<sup>b</sup> *Fusarium* internal transcribed spacer (ITS) and translation elongation factor 1 alpha (EF-1 $\alpha$ ) sequences accession in GenBank.

Table S3. Morphological characteristics of the endophytic *Fusarium tricinctum* species complex (FTSC)-like isolates collected from *Cirsium kawakamii* in this study

| Spore         | Shape                                                                                                   | Media                   | Size(μm)           |                 | Characters on PSA                                                         |
|---------------|---------------------------------------------------------------------------------------------------------|-------------------------|--------------------|-----------------|---------------------------------------------------------------------------|
|               |                                                                                                         |                         | Length (mean)      | Width (mean)    |                                                                           |
| Chlamydospore | Globose to subglobose                                                                                   | Soil broth <sup>1</sup> | 04.3 – 14.8 (7.8)  | 0.4 – 3.9 (6.1) | Aerial mycelium abundant and cottony above the agar surface.              |
| Macroconidia  | Sickle, slight curved, 1-5 septates (most 1 or 3 septate) hooked apical cell and foot-shaped basal cell | SNA <sup>2</sup>        | 18.7 – 72.5 (35.8) | 2.1 – 4.8 (3.7) | Produces red pigments. Rare orange sporodochial conidial masses observed. |
| Microconidia  | Fusiform, nonseptate                                                                                    | SNA                     | 06.5 – 16.7 (12.0) | 1.8 – 4.1 (2.9) |                                                                           |

<sup>1</sup> Soil broth promotes *Fusarium* chlamydospore formation [70].

<sup>2</sup> Synthetic nutrient agar (SNA) is the medium for the classification of *Fusarium* species [71].
